# Supplementary material for: Construction of immune-related gene pairs signature to predict the overall survival of osteosarcoma patients
Source: publisher site journal article supplement (doi:10.18632/aging.104017), 2020-11-16
Supplement: Supplementary file [file aging-v12i22-104017-supplementary-material-SD5.pdf]

## SUPPLEMENTARY TABLES

**Supplementary Table 4. Results of Univariate Cox regression of IRGP with higher variation. (P<0.005).**

| <b>IRGP</b>      | <b>HR</b>  | <b>HR.95L</b> | <b>HR.95H</b> | <b>coxPvalue</b> |
|------------------|------------|---------------|---------------|------------------|
| FCER1G NDRG1     | 0.27639592 | 0.12554102    | 0.60852383    | 0.00140533       |
| HLA-DQB1 STC2    | 0.23444675 | 0.09967148    | 0.55146446    | 0.0008881        |
| APOBEC3G GAL     | 0.33497266 | 0.1591734     | 0.70493365    | 0.0039641        |
| FABP4 GAL        | 0.23429033 | 0.09975861    | 0.55024781    | 0.00086442       |
| OASL GAL         | 0.33794111 | 0.1617213     | 0.70617906    | 0.00391252       |
| APOD CCL2        | 3.03038955 | 1.43686979    | 6.39115728    | 0.00359138       |
| TFRC ANGPTL2     | 3.63343365 | 1.69767116    | 7.77644128    | 0.00088986       |
| TFRC TNFRSF21    | 3.00990706 | 1.42652227    | 6.35078797    | 0.00382254       |
| F2R SEMA3B       | 0.32349419 | 0.15533762    | 0.67368412    | 0.00256725       |
| F2R ANGPTL4      | 0.29288792 | 0.13270808    | 0.64640626    | 0.00236392       |
| CCL5 SEMA3B      | 0.2096095  | 0.07978568    | 0.55067705    | 0.0015214        |
| WNT5A GAL        | 0.28471691 | 0.13684325    | 0.59238377    | 0.00077754       |
| HMOX1 FOS        | 0.32346229 | 0.15451936    | 0.67711811    | 0.00274979       |
| HCK SEMA5A       | 0.28401534 | 0.12572024    | 0.64162071    | 0.00246845       |
| HCK PLXNB1       | 0.27935222 | 0.12343848    | 0.63219887    | 0.00221056       |
| HCK GAL          | 0.28460063 | 0.13388452    | 0.60498048    | 0.00109025       |
| HCK STC1         | 0.20276464 | 0.07029161    | 0.58489914    | 0.00315527       |
| RAC3 FGFRL1      | 7.15301218 | 2.12340384    | 24.0960209    | 0.00149745       |
| SEMA3A SEMA4D    | 0.33542642 | 0.16001111    | 0.70314419    | 0.00382089       |
| SEMA3A GAL       | 0.22876178 | 0.10756573    | 0.48651139    | 0.00012742       |
| SEMA3A TNFRSF11B | 0.31504209 | 0.1457478     | 0.68098126    | 0.003315         |
| SEMA3B LTBP4     | 3.63638195 | 1.74042023    | 7.59774764    | 0.00059502       |
| SEMA3B VEGFC     | 2.95306523 | 1.3886214     | 6.28003733    | 0.00491149       |
| SEMA3B C3AR1     | 3.7431678  | 1.51781114    | 9.2312573     | 0.00415712       |
| SEMA3B FGFRL1    | 4.25029395 | 1.96251825    | 9.20500926    | 0.00024253       |
| SEMA5A C5AR1     | 3.93004313 | 1.59685975    | 9.67225772    | 0.00289627       |
| C5AR1 PLXNB1     | 0.26887173 | 0.10918511    | 0.66210498    | 0.00428033       |
| EDNRA STC2       | 0.22184761 | 0.10620662    | 0.46340204    | 6.16E-05         |
| PLXNB1 VEGFC     | 2.88263163 | 1.38280123    | 6.009226      | 0.00473213       |
| PLXNB1 FGFRL1    | 3.23045085 | 1.51805887    | 6.87444531    | 0.00233969       |
| IGF2 PDGFD       | 0.33598457 | 0.1612484     | 0.7000729     | 0.00359188       |
| ANGPTL2 SORT1    | 0.2760354  | 0.13008073    | 0.5857558     | 0.00079861       |

**Supplementary Table 5. Clinical information of patients in the GSE78220 data set.**

| <b>ID</b>  | <b>Gender</b> | <b>Age</b> | <b>OS</b> | <b>Status</b> | <b>Response</b> |
|------------|---------------|------------|-----------|---------------|-----------------|
| GSM2069823 | F             | 66         | 607       | DEAD          | progressive     |
| GSM2069824 | M             | 55         | 927       | ALIVE         | Partial         |
| GSM2069825 | M             | 62         | 948       | ALIVE         | Partial         |
| GSM2069826 | M             | 61         | 439       | ALIVE         | Partial         |
| GSM2069827 | M             | 51         | 882       | ALIVE         | Partial         |
| GSM2069828 | F             | 55         | 662       | DEAD          | progressive     |
| GSM2069829 | M             | 69         | NA        | NA            | Complete        |
| GSM2069830 | M             | 68         | 1054      | ALIVE         | Complete        |
| GSM2069831 | M             | 60         | 387       | ALIVE         | progressive     |
| GSM2069832 | M             | 59         | 327       | DEAD          | progressive     |
| GSM2069833 | F             | 53         | 917       | ALIVE         | Complete        |
| GSM2069834 | F             | 27         | 54        | ALIVE         | progressive     |
| GSM2069835 | M             | 70         | 980       | DEAD          | Partial         |
| GSM2069836 | M             | 19         | 186       | DEAD          | progressive     |
| GSM2069837 | M             | 45         | 1060      | ALIVE         | Partial         |
| GSM2069838 | F             | 63         | 337       | DEAD          | progressive     |
| GSM2069839 | M             | 55         | 182       | DEAD          | progressive     |
| GSM2069840 | M             | 63         | 103       | DEAD          | progressive     |
| GSM2069841 | M             | 74         | 262       | DEAD          | progressive     |
| GSM2069842 | M             | 83         | 548       | ALIVE         | Complete        |
| GSM2069843 | M             | 83         | 548       | ALIVE         | Complete        |
| GSM2069844 | M             | 82         | 439       | DEAD          | Partial         |
| GSM2069845 | M             | 84         | 269       | DEAD          | progressive     |
| GSM2069846 | M             | 47         | 704       | ALIVE         | progressive     |
| GSM2069847 | M             | 47         | 171       | DEAD          | progressive     |
| GSM2069848 | F             | 65         | 427       | ALIVE         | Partial         |
| GSM2069849 | F             | 70         | 364       | ALIVE         | Partial         |
| GSM2069850 | F             | 57         | 448       | ALIVE         | Partial         |
