# Supplementary material for: Construction of immune-related gene pairs signature to predict the overall survival of osteosarcoma patients
Source: Aging (Albany NY). 2020 Nov 16;12(22):22906–26. doi: 10.18632/aging.104017 (PMC7746392; doi:10.18632/aging.104017)
Supplement: Supplementary Table 1 [file aging-12-104017-s002..xlsx]

## Sheet: Sheet1
Supplementary Table 1. IRGs with higher variation for the construction of immune-related gene pairs
Symbol	ID	Name	Synonyms	Chromosome	Category
CD74	972	CD74 molecule, major histocompatibility complex, class II invariant chain	DHLAG|HLADG|Ia-GAMMA	5	Antigen_Processing_and_Presentation
CTSB	1508	cathepsin B	APPS|CPSB	8	Antigen_Processing_and_Presentation
CTSS	1520	cathepsin S	MGC3886	1	Antigen_Processing_and_Presentation
FCER1G	2207	Fc fragment of IgE, high affinity I, receptor for; gamma polypeptide	FCRG	1	Antigen_Processing_and_Presentation
FCGRT	2217	Fc fragment of IgG, receptor, transporter, alpha	FCRN|alpha-chain	19	Antigen_Processing_and_Presentation
HLA-A	3105	major histocompatibility complex, class I, A	FLJ26655|HLAA	6	Antigen_Processing_and_Presentation
HLA-B	3106	major histocompatibility complex, class I, B	AS|HLA-B-7301|HLA-B73|HLAB|HLAC|MGC111087|SPDA1	6	Antigen_Processing_and_Presentation
HLA-C	3107	major histocompatibility complex, class I, C	D6S204|FLJ27082|HLA-Cw|HLA-Cw12|HLA-JY3|HLC-C|PSORS1	6	Antigen_Processing_and_Presentation
HLA-DMA	3108	major histocompatibility complex, class II, DM alpha	D6S222E|DMA|HLADM|RING6	6	Antigen_Processing_and_Presentation
HLA-DMB	3109	major histocompatibility complex, class II, DM beta	D6S221E|RING7	6	Antigen_Processing_and_Presentation
HLA-DPA1	3113	major histocompatibility complex, class II, DP alpha 1	HLA-DP1A|HLADP|HLASB	6	Antigen_Processing_and_Presentation
HLA-DPB1	3115	major histocompatibility complex, class II, DP beta 1	DPB1|HLA-DP1B	6	Antigen_Processing_and_Presentation
HLA-DQA1	3117	major histocompatibility complex, class II, DQ alpha 1	CD|CELIAC1|DQ-A1|FLJ27088|FLJ27328|GSE|HLA-DQA|MGC149527	6	Antigen_Processing_and_Presentation
HLA-DQB1	3119	major histocompatibility complex, class II, DQ beta 1	CELIAC1|HLA-DQB|IDDM1	6	Antigen_Processing_and_Presentation
HLA-DRA	3122	major histocompatibility complex, class II, DR alpha	HLA-DRA1	6	Antigen_Processing_and_Presentation
HLA-DRB1	3123	major histocompatibility complex, class II, DR beta 1	DRB1|FLJ75017|FLJ76359|HLA-DR1B|HLA-DRB|HLA-DRB1*|SS1	6	Antigen_Processing_and_Presentation
HLA-E	3133	major histocompatibility complex, class I, E	DKFZp686P19218|EA1.2|EA2.1|HLA-6.2|MHC|QA1	6	Antigen_Processing_and_Presentation
HLA-F	3134	major histocompatibility complex, class I, F	CDA12|HLA-5.4|HLA-CDA12|HLAF	6	Antigen_Processing_and_Presentation
HLA-H	3136	major histocompatibility complex, class I, H (pseudogene)	HLAHP	6	Antigen_Processing_and_Presentation
HSPA4	3308	heat shock 70kDa protein 4	APG-2|HS24/P52|MGC131852|RY|hsp70|hsp70RY	5	Antigen_Processing_and_Presentation
HSPA6	3310	heat shock 70kDa protein 6 (HSP70B')	-	1	Antigen_Processing_and_Presentation
LGMN	5641	legumain	AEP|LGMN1|PRSC1	14	Antigen_Processing_and_Presentation
PSMB8	5696	proteasome (prosome, macropain) subunit, beta type, 8 (large multifunctional peptidase 7)	D6S216|D6S216E|LMP7|MGC1491|PSMB5i|RING10|beta5i	6	Antigen_Processing_and_Presentation
PSMC5	5705	proteasome (prosome, macropain) 26S subunit, ATPase, 5	S8|SUG-1|SUG1|TBP10|TRIP1|p45|p45/SUG	17	Antigen_Processing_and_Presentation
PSME2	5721	proteasome (prosome, macropain) activator subunit 2 (PA28 beta)	PA28B|PA28beta|REGbeta	14	Antigen_Processing_and_Presentation
TAP1	6890	transporter 1, ATP-binding cassette, sub-family B (MDR/TAP)	ABC17|ABCB2|APT1|D6S114E|FLJ26666|FLJ41500|PSF1|RING4|TAP1*0102N|TAP1N	6	Antigen_Processing_and_Presentation
THBS1	7057	thrombospondin 1	THBS|THBS-1|TSP|TSP-1|TSP1	15	Antigen_Processing_and_Presentation
PSMD6	9861	proteasome (prosome, macropain) 26S subunit, non-ATPase, 6	KIAA0107|Rpn7|S10|SGA-113M|p44S10	3	Antigen_Processing_and_Presentation
PSMD14	10213	proteasome (prosome, macropain) 26S subunit, non-ATPase, 14	PAD1|POH1|rpn11	2	Antigen_Processing_and_Presentation
IFI30	10437	interferon, gamma-inducible protein 30	GILT|IFI-30|IP30|MGC32056	19	Antigen_Processing_and_Presentation
CD209	30835	CD209 molecule	CDSIGN|CLEC4L|DC-SIGN|DC-SIGN1|MGC129965	19	Antigen_Processing_and_Presentation
CXCL14	9547	chemokine (C-X-C motif) ligand 14	BMAC|BRAK|KS1|Kec|MGC10687|MIP-2g|NJAC|SCYB14|bolekine	5	Antimicrobials
CXCL16	58191	chemokine (C-X-C motif) ligand 16	CXCLG16|SR-PSOX|SRPSOX	17	Antimicrobials
SLPI	6590	secretory leukocyte peptidase inhibitor	ALK1|ALP|BLPI|HUSI|HUSI-I|MPI|WAP4|WFDC4	20	Antimicrobials
CXCL10	3627	chemokine (C-X-C motif) ligand 10	C7|IFI10|INP10|IP-10|SCYB10|crg-2|gIP-10|mob-1	4	Antimicrobials
CXCL9	4283	chemokine (C-X-C motif) ligand 9	CMK|Humig|MIG|SCYB9|crg-10	4	Antimicrobials
CXCL11	6373	chemokine (C-X-C motif) ligand 11	H174|I-TAC|IP-9|IP9|MGC102770|SCYB11|SCYB9B|b-R1	4	Antimicrobials
CXCL12	6387	chemokine (C-X-C motif) ligand 12 (stromal cell-derived factor 1)	PBSF|SCYB12|SDF-1a|SDF-1b|SDF1|SDF1A|SDF1B|TLSF-a|TLSF-b|TPAR1	10	Antimicrobials
CXCL13	10563	chemokine (C-X-C motif) ligand 13	ANGIE|ANGIE2|BCA-1|BCA1|BLC|BLR1L|SCYB13	4	Antimicrobials
CCL8	6355	chemokine (C-C motif) ligand 8	HC14|MCP-2|MCP2|SCYA10|SCYA8	17	Antimicrobials
S100A9	6280	S100 calcium binding protein A9	60B8AG|CAGB|CFAG|CGLB|L1AG|LIAG|MAC387|MIF|MRP14|NIF|P14	1	Antimicrobials
S100A8	6279	S100 calcium binding protein A8	60B8AG|CAGA|CFAG|CGLA|CP-10|L1Ag|MA387|MIF|MRP8|NIF|P8	1	Antimicrobials
PTGDS	5730	prostaglandin D2 synthase 21kDa (brain)	LPGDS|PDS|PGD2|PGDS|PGDS2	9	Antimicrobials
S100A10	6281	S100 calcium binding protein A10	42C|ANX2L|ANX2LG|CAL1L|CLP11|Ca[1]|GP11|MGC111133|P11|p10	1	Antimicrobials
S100A11	6282	S100 calcium binding protein A11	MLN70|S100C	1	Antimicrobials
S100A3	6274	S100 calcium binding protein A3	S100E	1	Antimicrobials
S100A16	140576	S100 calcium binding protein A16	AAG13|DT1P1A7|MGC17528|S100F	1	Antimicrobials
IFNAR1	3454	interferon (alpha, beta and omega) receptor 1	AVP|IFN-alpha-REC|IFNAR|IFNBR|IFRC	21	Antimicrobials
IFNGR1	3459	interferon gamma receptor 1	CD119|FLJ45734|IFNGR	6	Antimicrobials
MMP9	4318	matrix metallopeptidase 9 (gelatinase B, 92kDa gelatinase, 92kDa type IV collagenase)	CLG4B|GELB|MMP-9	20	Antimicrobials
NFKB1	4790	nuclear factor of kappa light polypeptide gene enhancer in B-cells 1	DKFZp686C01211|EBP-1|KBF1|MGC54151|NF-kappa-B|NFKB-p105|NFKB-p50|p105|p50	4	Antimicrobials
APOBEC3G	60489	apolipoprotein B mRNA editing enzyme, catalytic polypeptide-like 3G	ARP9|CEM15|FLJ12740|MDS019|bK150C2.7|dJ494G10.1	22	Antimicrobials
RBP1	5947	retinol binding protein 1, cellular	CRABP-I|CRBP|CRBP1|CRBPI|RBPC	3	Antimicrobials
PLAU	5328	plasminogen activator, urokinase	ATF|UPA|URK|u-PA	10	Antimicrobials
PLTP	5360	phospholipid transfer protein	HDLCQ9	20	Antimicrobials
MX1	4599	myxovirus (influenza virus) resistance 1, interferon-inducible protein p78 (mouse)	IFI-78K|IFI78|MX|MxA	21	Antimicrobials
RBP4	5950	retinol binding protein 4, plasma	-	10	Antimicrobials
FABP5	2171	fatty acid binding protein 5 (psoriasis-associated)	E-FABP|EFABP|PA-FABP|PAFABP	8	Antimicrobials
FABP4	2167	fatty acid binding protein 4, adipocyte	A-FABP|aP2	8	Antimicrobials
OASL	8638	2'-5'-oligoadenylate synthetase-like	TRIP14|p59OASL	12	Antimicrobials
CRABP2	1382	cellular retinoic acid binding protein 2	CRABP-II|RBP6	1	Antimicrobials
PI15	51050	peptidase inhibitor 15	CRISP8|DKFZp686F0366|P24TI|P25TI	8	Antimicrobials
APOD	347	apolipoprotein D	-	3	Antimicrobials
CYBB	1536	cytochrome b-245, beta polypeptide	CGD|GP91-1|GP91-PHOX|GP91PHOX|NOX2|p91-PHOX	X	Antimicrobials
TFRC	7037	transferrin receptor (p90, CD71)	CD71|TFR|TFR1|TRFR	3	Antimicrobials
STAT1	6772	signal transducer and activator of transcription 1, 91kDa	DKFZp686B04100|ISGF-3|STAT91	2	Antimicrobials
TNFSF10	8743	tumor necrosis factor (ligand) superfamily, member 10	APO2L|Apo-2L|CD253|TL2|TRAIL	3	Antimicrobials
IRF1	3659	interferon regulatory factor 1	IRF-1|MAR	5	Antimicrobials
RARRES3	5920	retinoic acid receptor responder (tazarotene induced) 3	HRASLS4|MGC8906|PLA1/2-3|RIG1|TIG3	11	Antimicrobials
TLR7	51284	toll-like receptor 7	-	X	Antimicrobials
ZYX	7791	zyxin	ESP-2|HED-2	7	Antimicrobials
TNFAIP3	7128	tumor necrosis factor, alpha-induced protein 3	A20|MGC104522|MGC138687|MGC138688|OTUD7C|TNFA1P2	6	Antimicrobials
F2R	2149	coagulation factor II (thrombin) receptor	CF2R|HTR|PAR1|TR	5	Antimicrobials
LYZ	4069	lysozyme (renal amyloidosis)	LZM|lysozyme	12	Antimicrobials
CCL5	6352	chemokine (C-C motif) ligand 5	D17S136E|MGC17164|RANTES|SCYA5|SISd|TCP228	17	Antimicrobials
EIF2AK2	5610	eukaryotic translation initiation factor 2-alpha kinase 2	EIF2AK1|MGC126524|PKR|PRKR	2	Antimicrobials
BST2	684	bone marrow stromal cell antigen 2	CD317	19	Antimicrobials
BPHL	670	biphenyl hydrolase-like (serine hydrolase)	BPH-RP|MCNAA|MGC125930|MGC41865|VACVASE	6	Antimicrobials
GRN	2896	granulin	GEP|GP88|PCDGF|PEPI|PGRN	17	Antimicrobials
PDGFRA	5156	platelet-derived growth factor receptor, alpha polypeptide	CD140A|MGC74795|PDGFR2|Rhe-PDGFRA	4	Antimicrobials
GNAI1	2770	guanine nucleotide binding protein (G protein), alpha inhibiting activity polypeptide 1	Gi	7	Antimicrobials
WNT5A	7474	wingless-type MMTV integration site family, member 5A	hWNT5A	3	Antimicrobials
TYK2	7297	tyrosine kinase 2	JTK1	19	Antimicrobials
TPM2	7169	tropomyosin 2 (beta)	AMCD1|DA1|DA2B|TMSB	9	Antimicrobials
DCK	1633	deoxycytidine kinase	MGC117410|MGC138632	4	Antimicrobials
IL18	3606	interleukin 18 (interferon-gamma-inducing factor)	IGIF|IL-18|IL-1g|IL1F4|MGC12320	11	Antimicrobials
PTX3	5806	pentraxin-related gene, rapidly induced by IL-1 beta	TNFAIP5|TSG-14	3	Antimicrobials
CD14	929	CD14 molecule	-	5	Antimicrobials
NDRG1	10397	N-myc downstream regulated 1	CAP43|CMT4D|DRG1|GC4|HMSNL|NDR1|NMSL|PROXY1|RIT42|RTP|TARG1|TDD5	8	Antimicrobials
TRIM22	10346	tripartite motif-containing 22	GPSTAF50|RNF94|STAF50	11	Antimicrobials
HMOX1	3162	heme oxygenase (decycling) 1	HO-1|HSP32|bK286B10	22	Antimicrobials
PDGFRB	5159	platelet-derived growth factor receptor, beta polypeptide	CD140B|JTK12|PDGF-R-beta|PDGFR|PDGFR1	5	Antimicrobials
GBP2	2634	guanylate binding protein 2, interferon-inducible	-	1	Antimicrobials
ACTG1	71	actin, gamma 1	ACT|ACTG|DFNA20|DFNA26	17	Antimicrobials
CCL2	6347	chemokine (C-C motif) ligand 2	GDCF-2|HC11|HSMCR30|MCAF|MCP-1|MCP1|MGC9434|SCYA2|SMC-CF	17	Antimicrobials
CCL21	6366	chemokine (C-C motif) ligand 21	6Ckine|CKb9|ECL|MGC34555|SCYA21|SLC|TCA4	9	Antimicrobials
CCL3	6348	chemokine (C-C motif) ligand 3	G0S19-1|LD78ALPHA|MIP-1-alpha|MIP1A|SCYA3	17	Antimicrobials
CXCR4	7852	chemokine (C-X-C motif) receptor 4	CD184|D2S201E|FB22|HM89|HSY3RR|LAP3|LCR1|LESTR|NPY3R|NPYR|NPYRL|NPYY3R|WHIM	2	Antimicrobials
FGR	2268	Gardner-Rasheed feline sarcoma viral (v-fgr) oncogene homolog	FLJ43153|MGC75096|SRC2|c-fgr|c-src2|p55c-fgr|p58c-fgr	1	Antimicrobials
MIF	4282	macrophage migration inhibitory factor (glycosylation-inhibiting factor)	GIF|GLIF|MMIF	22	Antimicrobials
CD86	942	CD86 molecule	B7-2|B70|CD28LG2|LAB72|MGC34413	3	Antimicrobials
HCK	3055	hemopoietic cell kinase	JTK9	20	Antimicrobials
LYN	4067	v-yes-1 Yamaguchi sarcoma viral related oncogene homolog	FLJ26625|JTK8	8	BCRSignalingPathway
BTK	695	Bruton agammaglobulinemia tyrosine kinase	AGMX1|AT|ATK|BPK|IMD1|MGC126261|MGC126262|PSCTK1|XLA	X	BCRSignalingPathway
RAC2	5880	ras-related C3 botulinum toxin substrate 2 (rho family, small GTP binding protein Rac2)	EN-7|Gx|HSPC022	22	BCRSignalingPathway
RAC3	5881	ras-related C3 botulinum toxin substrate 3 (rho family, small GTP binding protein Rac3)	-	17	BCRSignalingPathway
NRAS	4893	neuroblastoma RAS viral (v-ras) oncogene homolog	ALPS4|N-ras|NRAS1	1	BCRSignalingPathway
FOS	2353	v-fos FBJ murine osteosarcoma viral oncogene homolog	AP-1|C-FOS	14	BCRSignalingPathway
MALT1	10892	mucosa associated lymphoid tissue lymphoma translocation gene 1	DKFZp434L132|MLT|MLT1	18	BCRSignalingPathway
NFKBIA	4792	nuclear factor of kappa light polypeptide gene enhancer in B-cells inhibitor, alpha	IKBA|MAD-3|NFKBI	14	BCRSignalingPathway
PIK3CA	5290	phosphoinositide-3-kinase, catalytic, alpha polypeptide	MGC142161|MGC142163|PI3K|p110-alpha	3	BCRSignalingPathway
INPP5D	3635	inositol polyphosphate-5-phosphatase, 145kDa	MGC104855|MGC142140|MGC142142|SHIP|SHIP1|SIP-145|hp51CN	2	BCRSignalingPathway
IFITM1	8519	interferon induced transmembrane protein 1 (9-27)	9-27|CD225|IFI17|LEU13	11	BCRSignalingPathway
C3	718	complement component 3	ARMD9|ASP|CPAMD1	19	Chemokines
CKLF	51192	chemokine-like factor	C32|CKLF1|CKLF2|CKLF3|CKLF4|HSPC224|UCK-1	16	Chemokines
CX3CL1	6376	chemokine (C-X3-C motif) ligand 1	ABCD-3|C3Xkine|CXC3|CXC3C|NTN|NTT|SCYD1|fractalkine|neurotactin	16	Chemokines
CYR61	3491	cysteine-rich, angiogenic inducer, 61	CCN1|GIG1|IGFBP10	1	Chemokines
SBDS	51119	Shwachman-Bodian-Diamond syndrome	CGI-97|FLJ10917|SDS|SWDS	7	Chemokines
SEMA3A	10371	sema domain, immunoglobulin domain (Ig), short basic domain, secreted, (semaphorin) 3A	Hsema-I|Hsema-III|MGC133243|SEMA1|SEMAD|SEMAIII|SEMAL|SemD|coll-1	7	Chemokines
SEMA3B	7869	sema domain, immunoglobulin domain (Ig), short basic domain, secreted, (semaphorin) 3B	FLJ34863|LUCA-1|SEMA5|SEMAA|SemA|semaV	3	Chemokines
SEMA4A	64218	sema domain, immunoglobulin domain (Ig), transmembrane domain (TM) and short cytoplasmic domain, (semaphorin) 4A	CORD10|FLJ12287|RP35|SEMAB|SEMB	1	Chemokines
SEMA4D	10507	sema domain, immunoglobulin domain (Ig), transmembrane domain (TM) and short cytoplasmic domain, (semaphorin) 4D	C9orf164|CD100|FLJ33485|FLJ34282|FLJ39737|FLJ46484|M-sema-G|MGC169138|MGC169141|SEMAJ|coll-4	9	Chemokines
SEMA5A	9037	sema domain, seven thrombospondin repeats (type 1 and type 1-like), transmembrane domain (TM) and short cytoplasmic domain, (semaphorin) 5A	FLJ12815|SEMAF|semF	5	Chemokines
SEMA6A	57556	sema domain, transmembrane domain (TM), and cytoplasmic domain, (semaphorin) 6A	HT018|KIAA1368|SEMA|SEMA6A1|SEMAQ|VIA	5	Chemokines
SEMA6C	10500	sema domain, transmembrane domain (TM), and cytoplasmic domain, (semaphorin) 6C	SEMAY|m-SemaY|m-SemaY2	1	Chemokines
SLIT2	9353	slit homolog 2 (Drosophila)	FLJ14420|SLIL3|Slit-2	4	Chemokines
TNC	3371	tenascin C	HXB|MGC167029|TN	9	Chemokines
C5AR1	728	complement component 5a receptor 1	C5A|C5AR|C5R1|CD88	19	Chemokine_Receptors
EDNRA	1909	endothelin receptor type A	ETA|ETRA	4	Chemokine_Receptors
FPR1	2357	formyl peptide receptor 1	FMLP|FPR	19	Chemokine_Receptors
PLAUR	5329	plasminogen activator, urokinase receptor	CD87|UPAR|URKR	19	Chemokine_Receptors
PLXNA1	5361	plexin A1	NOV|NOVP|PLEXIN-A1|PLXN1	3	Chemokine_Receptors
PLXNA3	55558	plexin A3	6.3|HSSEXGENE|PLEXIN-A3|PLXN3|PLXN4|SEX|XAP-6	X	Chemokine_Receptors
PLXNB1	5364	plexin B1	KIAA0407|MGC149167|PLEXIN-B1|PLXN5|SEP	3	Chemokine_Receptors
ADM	133	adrenomedullin	AM	11	Cytokines
APLN	8862	apelin	XNPEP2	X	Cytokines
BMP2	650	bone morphogenetic protein 2	BMP2A	20	Cytokines
BMP4	652	bone morphogenetic protein 4	BMP2B|BMP2B1|MCOPS6|OFC11|ZYME	14	Cytokines
BMP6	654	bone morphogenetic protein 6	VGR|VGR1	6	Cytokines
BMP7	655	bone morphogenetic protein 7	OP-1	20	Cytokines
CLEC11A	6320	C-type lectin domain family 11, member A	CLECSF3|LSLCL|P47|SCGF	19	Cytokines
CTGF	1490	connective tissue growth factor	CCN2|HCS24|IGFBP8|MGC102839|NOV2	6	Cytokines
DKK1	22943	dickkopf homolog 1 (Xenopus laevis)	DKK-1|SK	10	Cytokines
EBI3	10148	Epstein-Barr virus induced 3	IL27B	19	Cytokines
ESM1	11082	endothelial cell-specific molecule 1	endocan	5	Cytokines
GAL	51083	galanin prepropeptide	GALN|GLNN|GMAP|MGC40167	11	Cytokines
GMFG	9535	glia maturation factor, gamma	GMF-GAMMA|MGC126867	19	Cytokines
GPI	2821	glucose phosphate isomerase	AMF|GNPI|NLK|PGI|PHI|SA-36	19	Cytokines
GREM1	26585	gremlin 1, cysteine knot superfamily, homolog (Xenopus laevis)	CKTSF1B1|DAND2|DRM|GREMLIN|IHG-2|MGC126660|PIG2	15	Cytokines
IGF2	3481	insulin-like growth factor 2 (somatomedin A)	C11orf43|FLJ22066|FLJ44734|INSIGF|pp9974	11	Cytokines
IL17D	53342	interleukin 17D	FLJ30846|IL-17D|IL-22|IL-27|IL27	13	Cytokines
INHBB	3625	inhibin, beta B	MGC157939	2	Cytokines
JAG1	182	jagged 1 (Alagille syndrome)	AGS|AHD|AWS|CD339|HJ1|JAGL1|MGC104644	20	Cytokines
LTBP2	4053	latent transforming growth factor beta binding protein 2	C14orf141|LTBP3|MSTP031	14	Cytokines
LTBP4	8425	latent transforming growth factor beta binding protein 4	FLJ46318|FLJ90018|LTBP-4|LTBP-4L	19	Cytokines
NMB	4828	neuromedin B	MGC17211|MGC2277|MGC3936	15	Cytokines
NOV	4856	nephroblastoma overexpressed gene	CCN3|IGFBP9	8	Cytokines
PDGFC	56034	platelet derived growth factor C	FALLOTEIN|SCDGF	4	Cytokines
PDGFD	80310	platelet derived growth factor D	IEGF|MGC26867|MSTP036|SCDGF-B|SCDGFB	11	Cytokines
PDGFRL	5157	platelet-derived growth factor receptor-like	PDGRL|PRLTS	8	Cytokines
PTN	5764	pleiotrophin	HARP|HBGF8|HBNF|NEGF1	7	Cytokines
RABEP1	9135	rabaptin, RAB GTPase binding effector protein 1	RAB5EP|RABPT5	17	Cytokines
SPP1	6696	secreted phosphoprotein 1	BNSP|BSPI|ETA-1|MGC110940|OPN	4	Cytokines
STC1	6781	stanniocalcin 1	STC	8	Cytokines
STC2	8614	stanniocalcin 2	STC-2|STCRP	5	Cytokines
TGFB3	7043	transforming growth factor, beta 3	ARVD|FLJ16571|TGF-beta3	14	Cytokines
TNFRSF11B	4982	tumor necrosis factor receptor superfamily, member 11b	MGC29565|OCIF|OPG|TR1	8	Cytokines
TNFSF13B	10673	tumor necrosis factor (ligand) superfamily, member 13b	BAFF|BLYS|CD257|DTL|TALL-1|TALL1|THANK|TNFSF20|ZTNF4	13	Cytokines
VEGFC	7424	vascular endothelial growth factor C	Flt4-L|VRP	4	Cytokines
ADIPOR2	79602	adiponectin receptor 2	ACDCR2|FLJ21432|MGC4640|PAQR2	12	Cytokine_Receptors
ANGPT1	284	angiopoietin 1	AGP1|AGPT|ANG1	8	Cytokine_Receptors
ANGPTL2	23452	angiopoietin-like 2	ARP2|HARP|MGC8889	9	Cytokine_Receptors
ANGPTL4	51129	angiopoietin-like 4	ANGPTL2|ARP4|FIAF|HFARP|NL2|PGAR|pp1158	19	Cytokine_Receptors
BMPR2	659	bone morphogenetic protein receptor, type II (serine/threonine kinase)	BMPR-II|BMPR3|BMR2|BRK-3|FLJ41585|FLJ76945|PPH1|T-ALK	2	Cytokine_Receptors
C3AR1	719	complement component 3a receptor 1	AZ3B|C3AR|HNFAG09	12	Cytokine_Receptors
CALCRL	10203	calcitonin receptor-like	CGRPR|CRLR	2	Cytokine_Receptors
CSF1R	1436	colony stimulating factor 1 receptor	C-FMS|CD115|CSFR|FIM2|FMS	5	Cytokine_Receptors
ENG	2022	endoglin	CD105|END|FLJ41744|HHT1|ORW|ORW1	9	Cytokine_Receptors
FGFRL1	53834	fibroblast growth factor receptor-like 1	FGFR5|FHFR	4	Cytokine_Receptors
GHR	2690	growth hormone receptor	GHBP	5	Cytokine_Receptors
IGF2R	3482	insulin-like growth factor 2 receptor	CD222|CIMPR|M6P-R|MPR1|MPRI	6	Cytokine_Receptors
IL10RA	3587	interleukin 10 receptor, alpha	CDW210A|HIL-10R|IL-10R1|IL10R	11	Cytokine_Receptors
IL11RA	3590	interleukin 11 receptor, alpha	MGC2146	9	Cytokine_Receptors
IL13RA1	3597	interleukin 13 receptor, alpha 1	CD213A1|IL-13Ra|NR4	X	Cytokine_Receptors
IL2RB	3560	interleukin 2 receptor, beta	CD122|P70-75	22	Cytokine_Receptors
LGR4	55366	leucine-rich repeat-containing G protein-coupled receptor 4	GPR48	11	Cytokine_Receptors
LIFR	3977	leukemia inhibitory factor receptor alpha	CD118|FLJ98106|FLJ99923|LIF-R|SJS2|STWS|SWS	5	Cytokine_Receptors
NR4A2	4929	nuclear receptor subfamily 4, group A, member 2	HZF-3|NOT|NURR1|RNR1|TINUR	2	Cytokine_Receptors
OSMR	9180	oncostatin M receptor	MGC150626|MGC150627|MGC75127|OSMRB	5	Cytokine_Receptors
PTGER4	5734	prostaglandin E receptor 4 (subtype EP4)	EP4|EP4R|MGC126583	5	Cytokine_Receptors
RXRA	6256	retinoid X receptor, alpha	FLJ00280|FLJ00318|FLJ16020|FLJ16733|MGC102720|NR2B1	9	Cytokine_Receptors
SDC2	6383	syndecan 2	HSPG|HSPG1|SYND2	8	Cytokine_Receptors
SDC4	6385	syndecan 4	MGC22217|SYND4	20	Cytokine_Receptors
SORT1	6272	sortilin 1	Gp95|NT3	1	Cytokine_Receptors
TEK	7010	TEK tyrosine kinase, endothelial	CD202B|TIE-2|TIE2|VMCM|VMCM1	9	Cytokine_Receptors
TGFBR3	7049	transforming growth factor, beta receptor III	BGCAN|betaglycan	1	Cytokine_Receptors
TNFRSF12A	51330	tumor necrosis factor receptor superfamily, member 12A	CD266|FN14|TWEAKR	16	Cytokine_Receptors
TNFRSF14	8764	tumor necrosis factor receptor superfamily, member 14 (herpesvirus entry mediator)	ATAR|HVEA|HVEM|LIGHTR|TR2	1	Cytokine_Receptors
TNFRSF1B	7133	tumor necrosis factor receptor superfamily, member 1B	CD120b|TBPII|TNF-R-II|TNF-R75|TNFBR|TNFR1B|TNFR2|TNFR80|p75|p75TNFR	1	Cytokine_Receptors
TNFRSF21	27242	tumor necrosis factor receptor superfamily, member 21	BM-018|DR6|MGC31965	6	Cytokine_Receptors
TNFRSF25	8718	tumor necrosis factor receptor superfamily, member 25	APO-3|DDR3|DR3|LARD|TNFRSF12|TR3|TRAMP|WSL-1|WSL-LR	1	Cytokine_Receptors
ITGB2	3689	integrin, beta 2 (complement component 3 receptor 3 and 4 subunit)	CD18|LAD|LCAMB|LFA-1|MAC-1|MF17|MFI7	21	NaturalKiller_Cell_Cytotoxicity
PAK1	5058	p21 protein (Cdc42/Rac)-activated kinase 1	MGC130000|MGC130001|PAKalpha	11	NaturalKiller_Cell_Cytotoxicity
HCST	10870	hematopoietic cell signal transducer	DAP10|DKFZP586C1522|KAP10|PIK3AP	19	NaturalKiller_Cell_Cytotoxicity
CD48	962	CD48 molecule	BCM1|BLAST|BLAST1|MEM-102|SLAMF2|hCD48|mCD48	1	NaturalKiller_Cell_Cytotoxicity
PRKCA	5578	protein kinase C, alpha	AAG6|MGC129900|MGC129901|PKC-alpha|PKCA|PRKACA	17	NaturalKiller_Cell_Cytotoxicity
PRF1	5551	perforin 1 (pore forming protein)	FLH2|HPLH2|MGC65093|P1|PFN1|PFP	10	NaturalKiller_Cell_Cytotoxicity
NCK2	8440	NCK adaptor protein 2	GRB4|NCKbeta	2	TCRsignalingPathway
RHOA	387	ras homolog gene family, member A	ARH12|ARHA|RHO12|RHOH12	3	TCRsignalingPathway
CBLB	868	Cas-Br-M (murine) ecotropic retroviral transforming sequence b	DKFZp686J10223|DKFZp779A0729|DKFZp779F1443|FLJ36865|FLJ41152|Nbla00127|RNF56	3	TCRsignalingPathway
