# Supplementary material for: Construction of immune-related gene pairs signature to predict the overall survival of osteosarcoma patients
Source: Aging (Albany NY). 2020 Nov 16;12(22):22906–26. doi: 10.18632/aging.104017 (PMC7746392; doi:10.18632/aging.104017)
Supplement: Supplementary Table 2 [file aging-12-104017-s003..xlsx]

## Sheet: Stable2
Supplementary Table 2. IRGP with higher variation, which are used for further analysis
CD74|CTSB
CD74|S100A11
CD74|MIF
CTSB|RHOA
CTSS|HLA-DQB1
CTSS|HSPA4
CTSS|PSMD6
CTSS|CXCL12
CTSS|S100A9
CTSS|PTGDS
CTSS|F2R
CTSS|RAC3
CTSS|NRAS
CTSS|SEMA3B
CTSS|JAG1
CTSS|ANGPTL4
FCER1G|FCGRT
FCER1G|PSMC5
FCER1G|PSME2
FCER1G|ZYX
FCER1G|NDRG1
FCER1G|IFITM1
FCER1G|GPI
FCGRT|PSMC5
FCGRT|IFNGR1
FCGRT|TFRC
FCGRT|TPM2
FCGRT|CD14
FCGRT|NDRG1
FCGRT|FOS
FCGRT|NFKBIA
FCGRT|CTGF
FCGRT|GPI
FCGRT|SDC4
HLA-A|HLA-DRA
HLA-A|MMP9
HLA-A|SPP1
HLA-B|TNC
HLA-B|SPP1
HLA-C|HLA-DRB1
HLA-C|PTN
HLA-DMA|HLA-H
HLA-DMA|TAP1
HLA-DMA|THBS1
HLA-DMA|EIF2AK2
HLA-DMA|PDGFRB
HLA-DMA|ADM
HLA-DMA|TGFB3
HLA-DMA|ANGPTL2
HLA-DPA1|TAP1
HLA-DPA1|THBS1
HLA-DPA1|TFRC
HLA-DPA1|PDGFRB
HLA-DPA1|ADM
HLA-DPA1|CTGF
HLA-DPB1|CXCL14
HLA-DPB1|RBP4
HLA-DPB1|PTX3
HLA-DPB1|APLN
HLA-DPB1|BMP4
HLA-DPB1|IGF2
HLA-DPB1|PDGFC
HLA-DPB1|PTN
HLA-DPB1|ANGPTL4
HLA-DQA1|PSMD14
HLA-DQA1|CXCL14
HLA-DQA1|NFKB1
HLA-DQA1|MX1
HLA-DQA1|TFRC
HLA-DQA1|RARRES3
HLA-DQA1|EIF2AK2
HLA-DQA1|BPHL
HLA-DQA1|TYK2
HLA-DQA1|GBP2
HLA-DQA1|RAC2
HLA-DQA1|FOS
HLA-DQA1|CKLF
HLA-DQA1|ADM
HLA-DQA1|RXRA
HLA-DQA1|SORT1
HLA-DQA1|TNFRSF14
HLA-DQA1|PAK1
HLA-DQA1|HCST
HLA-DQB1|HLA-F
HLA-DQB1|PSMD6
HLA-DQB1|PSMD14
HLA-DQB1|CXCL14
HLA-DQB1|CXCL10
HLA-DQB1|CXCL12
HLA-DQB1|S100A9
HLA-DQB1|PTGDS
HLA-DQB1|S100A3
HLA-DQB1|S100A16
HLA-DQB1|IFNAR1
HLA-DQB1|OASL
HLA-DQB1|CYBB
HLA-DQB1|F2R
HLA-DQB1|CCL5
HLA-DQB1|PDGFRA
HLA-DQB1|GNAI1
HLA-DQB1|DCK
HLA-DQB1|HCK
HLA-DQB1|RAC3
HLA-DQB1|NRAS
HLA-DQB1|MALT1
HLA-DQB1|PIK3CA
HLA-DQB1|CX3CL1
HLA-DQB1|SEMA3B
HLA-DQB1|SEMA5A
HLA-DQB1|EDNRA
HLA-DQB1|PLAUR
HLA-DQB1|PLXNA1
HLA-DQB1|PLXNA3
HLA-DQB1|PLXNB1
HLA-DQB1|APLN
HLA-DQB1|BMP4
HLA-DQB1|BMP7
HLA-DQB1|ESM1
HLA-DQB1|GMFG
HLA-DQB1|IGF2
HLA-DQB1|INHBB
HLA-DQB1|JAG1
HLA-DQB1|LTBP2
HLA-DQB1|LTBP4
HLA-DQB1|NMB
HLA-DQB1|NOV
HLA-DQB1|PDGFC
HLA-DQB1|PDGFRL
HLA-DQB1|RABEP1
HLA-DQB1|STC1
HLA-DQB1|STC2
HLA-DQB1|VEGFC
HLA-DQB1|ANGPTL4
HLA-DQB1|BMPR2
HLA-DQB1|FGFRL1
HLA-DQB1|IL11RA
HLA-DQB1|LGR4
HLA-DQB1|OSMR
HLA-DQB1|SORT1
HLA-DQB1|TNFRSF1B
HLA-DQB1|PAK1
HLA-DQB1|PRKCA
HLA-DQB1|CBLB
HLA-DRA|TNC
HLA-DRA|CLEC11A
HLA-DRB1|THBS1
HLA-DRB1|CXCL14
HLA-DRB1|PLTP
HLA-DRB1|CRABP2
HLA-DRB1|ZYX
HLA-DRB1|TPM2
HLA-DRB1|NDRG1
HLA-DRB1|CYR61
HLA-DRB1|SBDS
HLA-DRB1|CTGF
HLA-DRB1|GPI
HLA-DRB1|ANGPTL2
HLA-DRB1|ENG
HLA-DRB1|SDC2
HLA-DRB1|SDC4
HLA-E|TNC
HLA-E|CTGF
HLA-F|HSPA6
HLA-F|CD209
HLA-F|CXCL14
HLA-F|S100A3
HLA-F|PI15
HLA-F|CYBB
HLA-F|TNFSF10
HLA-F|EIF2AK2
HLA-F|DCK
HLA-F|LYN
HLA-F|SEMA4D
HLA-F|PLAUR
HLA-F|PLXNA3
HLA-F|PLXNB1
HLA-F|ADM
HLA-F|ESM1
HLA-F|PDGFD
HLA-F|PDGFRL
HLA-F|RABEP1
HLA-F|TGFB3
HLA-F|VEGFC
HLA-F|ANGPTL4
HLA-F|BMPR2
HLA-F|FGFRL1
HLA-F|LGR4
HLA-F|PRKCA
HLA-F|CBLB
HLA-H|TAP1
HLA-H|THBS1
HLA-H|CXCL14
HLA-H|IFNAR1
HLA-H|CYBB
HLA-H|EIF2AK2
HLA-H|PDGFRA
HLA-H|TYK2
HLA-H|SLIT2
HLA-H|EDNRA
HLA-H|ADM
HLA-H|DKK1
HLA-H|IGF2
HLA-H|JAG1
HLA-H|LTBP4
HLA-H|PDGFD
HLA-H|PDGFRL
HLA-H|RABEP1
HLA-H|STC2
HLA-H|TGFB3
HLA-H|ANGPT1
HLA-H|GHR
HLA-H|RXRA
HLA-H|TNFRSF1B
HLA-H|PAK1
HLA-H|CBLB
HSPA4|PTGDS
HSPA6|CD209
HSPA6|CXCL14
HSPA6|CXCL10
HSPA6|CXCL9
HSPA6|CCL8
HSPA6|PTGDS
HSPA6|FABP4
HSPA6|TNFSF10
HSPA6|IRF1
HSPA6|BPHL
HSPA6|LYN
HSPA6|CX3CL1
HSPA6|SEMA3B
HSPA6|SEMA4D
HSPA6|SEMA6A
HSPA6|PLXNB1
HSPA6|ESM1
HSPA6|NOV
HSPA6|PDGFRL
HSPA6|LGR4
HSPA6|PTGER4
HSPA6|TGFBR3
HSPA6|TNFRSF25
HSPA6|PRKCA
HSPA6|CBLB
LGMN|PSMC5
LGMN|NDRG1
LGMN|FOS
PSMB8|CXCL14
PSMB8|PTGDS
PSMB8|IFNAR1
PSMB8|CRABP2
PSMB8|RAC3
PSMB8|PLAUR
PSMB8|IGF2
PSMB8|LTBP4
PSMB8|PDGFC
PSMB8|PDGFD
PSMB8|PDGFRL
PSMB8|PTN
PSMB8|ANGPTL4
PSMB8|PAK1
PSMC5|LYZ
PSMC5|TPM2
PSMC5|CD14
PSMC5|NDRG1
PSMC5|FOS
PSMC5|IFITM1
PSMC5|CTGF
PSMC5|GPI
PSME2|NDRG1
PSME2|IFITM1
TAP1|THBS1
TAP1|PDGFRB
TAP1|ADM
TAP1|TGFB3
TAP1|ANGPTL2
THBS1|CXCL14
THBS1|IFNGR1
THBS1|PLAU
THBS1|CRABP2
THBS1|TFRC
THBS1|TYK2
THBS1|PDGFRB
THBS1|RAC2
THBS1|RAC3
THBS1|CYR61
THBS1|GMFG
THBS1|TGFB3
THBS1|ADIPOR2
THBS1|ANGPTL2
THBS1|IGF2R
THBS1|IL13RA1
THBS1|RXRA
THBS1|SDC2
THBS1|SDC4
THBS1|TNFRSF21
THBS1|PAK1
PSMD6|CXCL10
PSMD6|CXCL12
PSMD6|PTGDS
PSMD6|CCL5
PSMD6|CCL2
PSMD6|C3
PSMD6|PLAUR
PSMD14|CXCL10
PSMD14|S100A16
PSMD14|CYBB
PSMD14|RARRES3
PSMD14|FOS
PSMD14|PLAUR
PSMD14|PLXNA1
PSMD14|GMFG
PSMD14|ADIPOR2
PSMD14|SORT1
PSMD14|TNFRSF14
CD209|CXCL14
CD209|S100A3
CD209|RBP4
CD209|FABP4
CD209|PI15
CD209|TNFAIP3
CD209|WNT5A
CD209|CCL21
CD209|INPP5D
CD209|SEMA3A
CD209|SEMA4D
CD209|SEMA5A
CD209|SEMA6A
CD209|SEMA6C
CD209|PLXNB1
CD209|BMP7
CD209|DKK1
CD209|ESM1
CD209|GREM1
CD209|IL17D
CD209|NMB
CD209|NOV
CD209|PDGFRL
CD209|STC1
CD209|STC2
CD209|ANGPT1
CD209|CALCRL
CD209|GHR
CD209|IL11RA
CD209|IL2RB
CD209|LGR4
CD209|NR4A2
CD209|PTGER4
CD209|TEK
CD209|TGFBR3
CD209|TNFRSF25
CD209|PRKCA
CXCL14|CXCL16
CXCL14|CXCL10
CXCL14|PTGDS
CXCL14|S100A3
CXCL14|IFNAR1
CXCL14|NFKB1
CXCL14|PLAU
CXCL14|CRABP2
CXCL14|CYBB
CXCL14|TFRC
CXCL14|TNFSF10
CXCL14|IRF1
CXCL14|RARRES3
CXCL14|F2R
CXCL14|EIF2AK2
CXCL14|PDGFRA
CXCL14|GNAI1
CXCL14|TYK2
CXCL14|DCK
CXCL14|PTX3
CXCL14|TRIM22
CXCL14|GBP2
CXCL14|HCK
CXCL14|LYN
CXCL14|RAC3
CXCL14|NRAS
CXCL14|PIK3CA
CXCL14|INPP5D
CXCL14|SEMA3B
CXCL14|SEMA5A
CXCL14|SEMA6C
CXCL14|SLIT2
CXCL14|C5AR1
CXCL14|EDNRA
CXCL14|PLAUR
CXCL14|PLXNA3
CXCL14|PLXNB1
CXCL14|ADM
CXCL14|APLN
CXCL14|BMP2
CXCL14|BMP4
CXCL14|BMP7
CXCL14|DKK1
CXCL14|ESM1
CXCL14|IGF2
CXCL14|INHBB
CXCL14|JAG1
CXCL14|LTBP4
CXCL14|NMB
CXCL14|PDGFC
CXCL14|PDGFD
CXCL14|PDGFRL
CXCL14|PTN
CXCL14|RABEP1
CXCL14|STC1
CXCL14|STC2
CXCL14|TGFB3
CXCL14|VEGFC
CXCL14|ANGPT1
CXCL14|ANGPTL4
CXCL14|BMPR2
CXCL14|C3AR1
CXCL14|CALCRL
CXCL14|FGFRL1
CXCL14|LGR4
CXCL14|OSMR
CXCL14|RXRA
CXCL14|SDC2
CXCL14|SORT1
CXCL14|TNFRSF12A
CXCL14|TNFRSF1B
CXCL14|PAK1
CXCL14|PRKCA
CXCL14|CBLB
CXCL16|PLAU
CXCL16|RARRES3
CXCL16|TYK2
CXCL16|RAC2
CXCL16|ADM
CXCL16|GMFG
CXCL16|ADIPOR2
CXCL16|RXRA
CXCL16|TNFRSF21
CXCL16|NCK2
SLPI|CXCL11
SLPI|CXCL13
SLPI|APOBEC3G
SLPI|RBP1
SLPI|RBP4
SLPI|FABP4
SLPI|OASL
SLPI|PI15
SLPI|TLR7
SLPI|WNT5A
SLPI|CCL21
SLPI|CD86
SLPI|BTK
SLPI|RAC3
SLPI|MALT1
SLPI|PIK3CA
SLPI|INPP5D
SLPI|SEMA3A
SLPI|SEMA3B
SLPI|SEMA4A
SLPI|SEMA5A
SLPI|SEMA6A
SLPI|SEMA6C
SLPI|FPR1
SLPI|BMP6
SLPI|BMP7
SLPI|DKK1
SLPI|EBI3
SLPI|ESM1
SLPI|GAL
SLPI|GREM1
SLPI|IL17D
SLPI|INHBB
SLPI|LTBP2
SLPI|NMB
SLPI|TNFRSF11B
SLPI|TNFSF13B
SLPI|VEGFC
SLPI|ANGPT1
SLPI|CALCRL
SLPI|IL10RA
SLPI|IL11RA
SLPI|IL2RB
SLPI|LGR4
SLPI|LIFR
SLPI|NR4A2
SLPI|PTGER4
SLPI|TEK
SLPI|TGFBR3
SLPI|PRF1
CXCL10|PTGDS
CXCL10|NFKB1
CXCL10|FABP4
CXCL10|CYBB
CXCL10|TFRC
CXCL10|TNFSF10
CXCL10|IRF1
CXCL10|RARRES3
CXCL10|F2R
CXCL10|EIF2AK2
CXCL10|BPHL
CXCL10|TYK2
CXCL10|DCK
CXCL10|GBP2
CXCL10|CCL2
CXCL10|HCK
CXCL10|LYN
CXCL10|RAC2
CXCL10|RAC3
CXCL10|SEMA3B
CXCL10|SEMA6A
CXCL10|EDNRA
CXCL10|PLAUR
CXCL10|PLXNA3
CXCL10|ADM
CXCL10|ESM1
CXCL10|LTBP4
CXCL10|NOV
CXCL10|PDGFRL
CXCL10|RABEP1
CXCL10|STC1
CXCL10|ANGPTL4
CXCL10|BMPR2
CXCL10|FGFRL1
CXCL10|LGR4
CXCL10|NR4A2
CXCL10|RXRA
CXCL10|SORT1
CXCL10|TNFRSF1B
CXCL10|PAK1
CXCL10|HCST
CXCL10|CBLB
CXCL9|CXCL12
CXCL9|S100A9
CXCL9|S100A8
CXCL9|PTGDS
CXCL9|RBP1
CXCL9|FABP4
CXCL9|OASL
CXCL9|PI15
CXCL9|TNFSF10
CXCL9|TNFAIP3
CXCL9|BPHL
CXCL9|TRIM22
CXCL9|CCL2
CXCL9|CCL21
CXCL9|CCL3
CXCL9|FGR
CXCL9|PIK3CA
CXCL9|C3
CXCL9|CX3CL1
CXCL9|SEMA3B
CXCL9|SEMA5A
CXCL9|SEMA6A
CXCL9|FPR1
CXCL9|PLXNB1
CXCL9|BMP7
CXCL9|LTBP2
CXCL9|NOV
CXCL9|PDGFRL
CXCL9|TNFSF13B
CXCL9|IL10RA
CXCL9|IL11RA
CXCL9|NR4A2
CXCL9|TGFBR3
CXCL9|CD48
CXCL11|CXCL13
CXCL11|APOBEC3G
CXCL11|RBP1
CXCL11|FABP4
CXCL11|PI15
CXCL11|TNFAIP3
CXCL11|CCL21
CXCL11|FGR
CXCL11|SEMA4A
CXCL11|SEMA6A
CXCL11|EBI3
CXCL11|GAL
CXCL11|GREM1
CXCL11|IL17D
CXCL11|TNFRSF11B
CXCL11|IL11RA
CXCL11|NR4A2
CXCL11|PTGER4
CXCL11|TEK
CXCL11|PRF1
CXCL12|S100A9
CXCL12|PTGDS
CXCL12|FABP4
CXCL12|F2R
CXCL12|CCL5
CXCL12|GNAI1
CXCL12|CCL2
CXCL12|C3
CXCL13|PTGDS
CXCL13|APOBEC3G
CXCL13|RBP4
CXCL13|FABP4
CXCL13|OASL
CXCL13|PI15
CXCL13|TRIM22
CXCL13|CCL21
CXCL13|CCL3
CXCL13|FGR
CXCL13|CD86
CXCL13|PIK3CA
CXCL13|C3
CXCL13|CX3CL1
CXCL13|SEMA3A
CXCL13|SEMA3B
CXCL13|SEMA4A
CXCL13|SEMA5A
CXCL13|SEMA6C
CXCL13|BMP7
CXCL13|EBI3
CXCL13|GAL
CXCL13|IL17D
CXCL13|INHBB
CXCL13|LTBP2
CXCL13|NMB
CXCL13|ANGPT1
CXCL13|C3AR1
CXCL13|CALCRL
CXCL13|IL11RA
CXCL13|LGR4
CXCL13|NR4A2
CXCL13|TGFBR3
CXCL13|PRF1
CCL8|RBP4
CCL8|PI15
CCL8|BPHL
CCL8|CCL21
CCL8|SEMA4D
CCL8|SEMA6A
CCL8|DKK1
CCL8|TNFRSF25
S100A9|PTGDS
S100A9|FABP5
S100A9|F2R
S100A9|CCL5
S100A9|C3
S100A9|SEMA3B
S100A8|APOBEC3G
S100A8|RBP1
S100A8|FABP4
S100A8|BPHL
S100A8|C3
S100A8|SEMA6A
S100A8|FPR1
S100A8|TNFSF13B
S100A8|IL11RA
S100A8|NR4A2
S100A8|TGFBR3
S100A8|CD48
PTGDS|S100A3
PTGDS|IFNAR1
PTGDS|FABP5
PTGDS|FABP4
PTGDS|APOD
PTGDS|CYBB
PTGDS|TNFSF10
PTGDS|TNFAIP3
PTGDS|F2R
PTGDS|CCL5
PTGDS|GNAI1
PTGDS|DCK
PTGDS|TRIM22
PTGDS|CCL2
PTGDS|CCL3
PTGDS|CXCR4
PTGDS|RAC3
PTGDS|NRAS
PTGDS|C3
PTGDS|SEMA3B
PTGDS|SEMA6A
PTGDS|FPR1
PTGDS|PLXNA1
PTGDS|PLXNB1
PTGDS|JAG1
PTGDS|LTBP4
PTGDS|STC1
PTGDS|ANGPTL4
PTGDS|BMPR2
PTGDS|C3AR1
PTGDS|FGFRL1
PTGDS|TGFBR3
S100A10|SPP1
S100A3|RBP4
S100A3|FABP4
S100A3|PI15
S100A3|TNFAIP3
S100A3|WNT5A
S100A3|PTX3
S100A3|CCL21
S100A3|RAC3
S100A3|INPP5D
S100A3|CX3CL1
S100A3|SEMA3A
S100A3|SEMA4D
S100A3|SEMA6A
S100A3|SLIT2
S100A3|C5AR1
S100A3|PLXNA3
S100A3|PLXNB1
S100A3|BMP2
S100A3|DKK1
S100A3|ESM1
S100A3|GREM1
S100A3|INHBB
S100A3|NMB
S100A3|NOV
S100A3|PDGFD
S100A3|STC1
S100A3|STC2
S100A3|TNFSF13B
S100A3|VEGFC
S100A3|ANGPT1
S100A3|BMPR2
S100A3|CALCRL
S100A3|FGFRL1
S100A3|GHR
S100A3|IL10RA
S100A3|IL11RA
S100A3|IL2RB
S100A3|LGR4
S100A3|PTGER4
S100A3|PRKCA
S100A3|CBLB
S100A16|F2R
S100A16|HMOX1
S100A16|CXCR4
S100A16|SBDS
S100A16|PLXNA1
S100A16|GMFG
S100A16|SORT1
S100A16|TNFRSF12A
S100A16|NCK2
IFNAR1|CYBB
IFNAR1|RARRES3
IFNAR1|RAC3
IFNAR1|PLAUR
IFNAR1|IGF2
IFNAR1|JAG1
IFNAR1|LTBP4
IFNAR1|ANGPTL4
IFNAR1|FGFRL1
IFNAR1|TNFRSF1B
IFNAR1|PAK1
IFNGR1|TFRC
IFNGR1|TYK2
IFNGR1|NDRG1
IFNGR1|RAC2
IFNGR1|FOS
IFNGR1|ADIPOR2
IFNGR1|IGF2R
IFNGR1|TNFRSF21
NFKB1|RARRES3
NFKB1|GBP2
NFKB1|LYN
NFKB1|ADM
APOBEC3G|RBP1
APOBEC3G|FABP4
APOBEC3G|OASL
APOBEC3G|PI15
APOBEC3G|TNFAIP3
APOBEC3G|CCL21
APOBEC3G|CCL3
APOBEC3G|FGR
APOBEC3G|CD86
APOBEC3G|C3
APOBEC3G|SEMA6A
APOBEC3G|BMP7
APOBEC3G|EBI3
APOBEC3G|GAL
APOBEC3G|GREM1
APOBEC3G|IL11RA
APOBEC3G|NR4A2
APOBEC3G|PRF1
RBP1|FABP4
RBP1|OASL
RBP1|PI15
RBP1|CCL21
RBP1|FGR
RBP1|BTK
RBP1|C3
RBP1|SEMA4A
RBP1|FPR1
RBP1|EBI3
RBP1|GAL
RBP1|GREM1
RBP1|IL17D
RBP1|TNFSF13B
RBP1|IL11RA
RBP1|NR4A2
RBP1|PTGER4
RBP1|TGFBR3
RBP1|TNFRSF25
RBP1|CD48
RBP1|PRF1
PLAU|CRABP2
PLAU|EIF2AK2
PLAU|TYK2
PLAU|RAC2
PLAU|NRAS
PLAU|PLXNA1
PLAU|GMFG
PLAU|RABEP1
PLAU|ADIPOR2
PLAU|ANGPTL2
PLAU|IL13RA1
PLAU|LGR4
PLAU|RXRA
PLAU|SORT1
PLAU|TNFRSF21
PLAU|PAK1
PLTP|ZYX
PLTP|BST2
PLTP|SBDS
PLTP|TNFRSF12A
MX1|ADM
RBP4|FABP4
RBP4|OASL
RBP4|PI15
RBP4|TNFAIP3
RBP4|GNAI1
RBP4|WNT5A
RBP4|PTX3
RBP4|CCL21
RBP4|CD86
RBP4|BTK
RBP4|MALT1
RBP4|PIK3CA
RBP4|INPP5D
RBP4|SEMA3A
RBP4|SEMA3B
RBP4|SEMA5A
RBP4|SEMA6A
RBP4|SEMA6C
RBP4|C5AR1
RBP4|APLN
RBP4|BMP2
RBP4|BMP4
RBP4|BMP6
RBP4|BMP7
RBP4|DKK1
RBP4|ESM1
RBP4|GAL
RBP4|GREM1
RBP4|INHBB
RBP4|LTBP2
RBP4|NMB
RBP4|NOV
RBP4|PDGFC
RBP4|STC1
RBP4|STC2
RBP4|TNFRSF11B
RBP4|VEGFC
RBP4|ANGPT1
RBP4|BMPR2
RBP4|CALCRL
RBP4|IL11RA
RBP4|IL2RB
RBP4|LGR4
RBP4|LIFR
RBP4|NR4A2
RBP4|OSMR
RBP4|PTGER4
RBP4|TEK
RBP4|TGFBR3
FABP4|OASL
FABP4|PI15
FABP4|TNFSF10
FABP4|TLR7
FABP4|TNFAIP3
FABP4|BPHL
FABP4|WNT5A
FABP4|TRIM22
FABP4|CCL21
FABP4|CCL3
FABP4|FGR
FABP4|CD86
FABP4|HCK
FABP4|BTK
FABP4|MALT1
FABP4|PIK3CA
FABP4|INPP5D
FABP4|C3
FABP4|CX3CL1
FABP4|SEMA3A
FABP4|SEMA3B
FABP4|SEMA4A
FABP4|SEMA4D
FABP4|SEMA5A
FABP4|SEMA6A
FABP4|SEMA6C
FABP4|C5AR1
FABP4|FPR1
FABP4|PLXNB1
FABP4|BMP7
FABP4|DKK1
FABP4|EBI3
FABP4|ESM1
FABP4|GAL
FABP4|GREM1
FABP4|IL17D
FABP4|INHBB
FABP4|LTBP2
FABP4|NMB
FABP4|NOV
FABP4|TNFRSF11B
FABP4|TNFSF13B
FABP4|ANGPT1
FABP4|ANGPTL4
FABP4|CALCRL
FABP4|GHR
FABP4|IL10RA
FABP4|IL11RA
FABP4|IL2RB
FABP4|LIFR
FABP4|NR4A2
FABP4|PTGER4
FABP4|TEK
FABP4|TGFBR3
FABP4|TNFRSF25
FABP4|CD48
FABP4|PRKCA
FABP4|PRF1
OASL|PI15
OASL|CCL21
OASL|FGR
OASL|CD86
OASL|RAC3
OASL|MALT1
OASL|PIK3CA
OASL|SEMA3A
OASL|SEMA3B
OASL|SEMA5A
OASL|SEMA6C
OASL|C5AR1
OASL|BMP7
OASL|DKK1
OASL|EBI3
OASL|ESM1
OASL|GAL
OASL|GREM1
OASL|IL17D
OASL|INHBB
OASL|LTBP2
OASL|NMB
OASL|TNFRSF11B
OASL|ANGPT1
OASL|CALCRL
OASL|IL11RA
OASL|LGR4
OASL|NR4A2
OASL|TEK
OASL|PRF1
CRABP2|CXCR4
CRABP2|RAC2
CRABP2|NRAS
CRABP2|CYR61
CRABP2|EDNRA
CRABP2|BMP4
CRABP2|IGF2
CRABP2|PDGFC
CRABP2|PDGFD
CRABP2|PTN
CRABP2|ANGPTL4
CRABP2|IL13RA1
CRABP2|SDC2
CRABP2|SDC4
CRABP2|TNFRSF21
PI15|TLR7
PI15|WNT5A
PI15|CCL21
PI15|FGR
PI15|CD86
PI15|BTK
PI15|MALT1
PI15|PIK3CA
PI15|INPP5D
PI15|CX3CL1
PI15|SEMA3A
PI15|SEMA3B
PI15|SEMA4A
PI15|SEMA4D
PI15|SEMA5A
PI15|SEMA6A
PI15|SEMA6C
PI15|C5AR1
PI15|FPR1
PI15|PLXNA3
PI15|PLXNB1
PI15|BMP2
PI15|BMP6
PI15|BMP7
PI15|DKK1
PI15|EBI3
PI15|ESM1
PI15|GAL
PI15|GREM1
PI15|IL17D
PI15|INHBB
PI15|LTBP2
PI15|NMB
PI15|NOV
PI15|STC1
PI15|STC2
PI15|TNFSF13B
PI15|VEGFC
PI15|ANGPT1
PI15|BMPR2
PI15|CALCRL
PI15|GHR
PI15|IL10RA
PI15|IL11RA
PI15|IL2RB
PI15|LGR4
PI15|LIFR
PI15|NR4A2
PI15|PTGER4
PI15|TEK
PI15|TNFRSF25
PI15|CD48
PI15|PRKCA
PI15|PRF1
APOD|CCL2
CYBB|TNFSF10
CYBB|TNFAIP3
CYBB|F2R
CYBB|CCL5
CYBB|DCK
CYBB|CCL21
CYBB|RAC3
CYBB|CX3CL1
CYBB|SEMA3B
CYBB|PLAUR
CYBB|PLXNA3
CYBB|PLXNB1
CYBB|BMP7
CYBB|ESM1
CYBB|JAG1
CYBB|LTBP4
CYBB|NMB
CYBB|NOV
CYBB|RABEP1
CYBB|STC1
CYBB|ANGPTL4
CYBB|BMPR2
CYBB|FGFRL1
CYBB|IL11RA
CYBB|PAK1
TFRC|RARRES3
TFRC|TYK2
TFRC|CD14
TFRC|NDRG1
TFRC|PDGFRB
TFRC|RAC2
TFRC|FOS
TFRC|NFKBIA
TFRC|CKLF
TFRC|ADM
TFRC|ANGPTL2
TFRC|CSF1R
TFRC|IGF2R
TFRC|IL13RA1
TFRC|TNFRSF21
TFRC|ITGB2
STAT1|LYZ
STAT1|NDRG1
STAT1|HMOX1
STAT1|RAC2
STAT1|FOS
STAT1|TNFRSF12A
TNFSF10|BPHL
TNFSF10|DCK
TNFSF10|RAC3
TNFSF10|C3
TNFSF10|CX3CL1
TNFSF10|SEMA3B
TNFSF10|SEMA6A
TNFSF10|PLXNB1
TNFSF10|BMP7
TNFSF10|ESM1
TNFSF10|LTBP4
TNFSF10|NOV
TNFSF10|STC1
TNFSF10|ANGPTL4
TNFSF10|BMPR2
TNFSF10|FGFRL1
TNFSF10|IL11RA
TNFSF10|TGFBR3
TNFSF10|CBLB
IRF1|BPHL
IRF1|GBP2
IRF1|ADM
IRF1|ESM1
IRF1|CBLB
RARRES3|BPHL
RARRES3|TYK2
RARRES3|GBP2
RARRES3|RAC2
RARRES3|FOS
RARRES3|PLXNA1
RARRES3|ADM
RARRES3|GMFG
RARRES3|JAG1
RARRES3|RABEP1
RARRES3|ADIPOR2
RARRES3|RXRA
RARRES3|SORT1
RARRES3|TNFRSF1B
RARRES3|TNFRSF21
RARRES3|HCST
TLR7|CCL21
TLR7|BMP6
TLR7|DKK1
TLR7|EBI3
TLR7|GAL
TLR7|GREM1
TLR7|IL17D
TLR7|TNFRSF11B
TLR7|NR4A2
ZYX|BST2
ZYX|CD14
ZYX|HMOX1
ZYX|FOS
ZYX|GPI
ZYX|TNFRSF12A
TNFAIP3|TRIM22
TNFAIP3|CCL21
TNFAIP3|CCL3
TNFAIP3|HCK
TNFAIP3|CX3CL1
TNFAIP3|SEMA3B
TNFAIP3|SEMA5A
TNFAIP3|SEMA6A
TNFAIP3|C5AR1
TNFAIP3|PLXNB1
TNFAIP3|BMP7
TNFAIP3|GAL
TNFAIP3|NOV
TNFAIP3|TNFSF13B
TNFAIP3|IL10RA
TNFAIP3|IL11RA
TNFAIP3|NR4A2
TNFAIP3|PRKCA
F2R|CCL5
F2R|DCK
F2R|CCL21
F2R|CXCR4
F2R|RAC3
F2R|SEMA3B
F2R|PLAUR
F2R|PLXNA1
F2R|BMP7
F2R|JAG1
F2R|LTBP4
F2R|ANGPTL4
F2R|C3AR1
LYZ|CD14
LYZ|NDRG1
LYZ|FOS
LYZ|CKLF
LYZ|TNFRSF12A
CCL5|GNAI1
CCL5|DCK
CCL5|TRIM22
CCL5|CCL2
CCL5|RAC3
CCL5|C3
CCL5|SEMA3B
CCL5|PLAUR
CCL5|LTBP4
CCL5|ANGPTL4
CCL5|LGR4
EIF2AK2|PDGFRA
EIF2AK2|ADM
EIF2AK2|PDGFRL
EIF2AK2|RXRA
BST2|NDRG1
BST2|FOS
BST2|GPI
BST2|TNFRSF12A
BPHL|TRIM22
BPHL|CCL2
BPHL|C3
BPHL|SEMA3B
BPHL|FPR1
BPHL|PLXNB1
BPHL|NOV
BPHL|PDGFRL
BPHL|TNFSF13B
BPHL|IL10RA
BPHL|CD48
PDGFRA|SLIT2
PDGFRA|EDNRA
PDGFRA|DKK1
PDGFRA|IGF2
PDGFRA|PDGFRL
GNAI1|CCL21
GNAI1|C5AR1
GNAI1|BMP7
GNAI1|ESM1
GNAI1|LTBP2
GNAI1|C3AR1
GNAI1|OSMR
WNT5A|PTX3
WNT5A|CCL21
WNT5A|SEMA3A
WNT5A|SEMA5A
WNT5A|SEMA6C
WNT5A|BMP2
WNT5A|BMP6
WNT5A|BMP7
WNT5A|DKK1
WNT5A|ESM1
WNT5A|GAL
WNT5A|GREM1
WNT5A|INHBB
WNT5A|NOV
WNT5A|STC1
WNT5A|STC2
WNT5A|TNFRSF11B
WNT5A|VEGFC
WNT5A|ANGPT1
WNT5A|CALCRL
WNT5A|GHR
WNT5A|LGR4
WNT5A|LIFR
WNT5A|NR4A2
TYK2|RAC2
TYK2|ADM
TYK2|ADIPOR2
TYK2|CSF1R
TYK2|IGF2R
TYK2|IL13RA1
TYK2|RXRA
TYK2|TNFRSF21
TPM2|CD14
TPM2|NDRG1
TPM2|FOS
TPM2|TNC
TPM2|CTGF
TPM2|GPI
TPM2|SDC4
DCK|HCK
DCK|RAC3
DCK|SEMA3B
DCK|PLAUR
DCK|PLXNB1
DCK|ESM1
DCK|LTBP4
DCK|NOV
DCK|RABEP1
DCK|STC1
DCK|ANGPTL4
DCK|BMPR2
DCK|FGFRL1
PTX3|CCL21
PTX3|SEMA3A
PTX3|SEMA5A
PTX3|SEMA6C
PTX3|PLXNA3
PTX3|PLXNB1
PTX3|APLN
PTX3|BMP2
PTX3|BMP4
PTX3|BMP6
PTX3|BMP7
PTX3|DKK1
PTX3|ESM1
PTX3|IGF2
PTX3|INHBB
PTX3|LTBP2
PTX3|PDGFC
PTX3|PDGFD
PTX3|STC2
PTX3|VEGFC
PTX3|ANGPT1
PTX3|GHR
PTX3|LGR4
PTX3|LIFR
PTX3|PRKCA
CD14|NDRG1
CD14|FOS
CD14|GPI
NDRG1|FOS
NDRG1|NFKBIA
NDRG1|CTGF
NDRG1|GPI
TRIM22|CCL21
TRIM22|CCL3
TRIM22|HCK
TRIM22|C3
TRIM22|CX3CL1
TRIM22|SEMA3B
TRIM22|SEMA5A
TRIM22|SEMA6A
TRIM22|C5AR1
TRIM22|PLXNB1
TRIM22|BMP7
TRIM22|NMB
TRIM22|NOV
TRIM22|STC1
TRIM22|TNFSF13B
TRIM22|IL11RA
TRIM22|NR4A2
TRIM22|CBLB
HMOX1|CXCR4
HMOX1|RAC2
HMOX1|FOS
HMOX1|CYR61
HMOX1|SBDS
HMOX1|PLXNA1
HMOX1|GMFG
HMOX1|ADIPOR2
HMOX1|ENG
HMOX1|IL13RA1
HMOX1|SDC4
HMOX1|SORT1
HMOX1|TNFRSF12A
HMOX1|TNFRSF21
HMOX1|NCK2
PDGFRB|RAC2
PDGFRB|ANGPTL2
PDGFRB|CSF1R
PDGFRB|TNFRSF21
GBP2|ADM
GBP2|SORT1
GBP2|HCST
CCL2|C3
CCL2|SEMA3B
CCL2|SEMA6A
CCL21|CCL3
CCL21|FGR
CCL21|CD86
CCL21|HCK
CCL21|BTK
CCL21|MALT1
CCL21|PIK3CA
CCL21|INPP5D
CCL21|C3
CCL21|CX3CL1
CCL21|SEMA3A
CCL21|SEMA3B
CCL21|SEMA4A
CCL21|SEMA5A
CCL21|SEMA6A
CCL21|SEMA6C
CCL21|C5AR1
CCL21|FPR1
CCL21|PLXNB1
CCL21|BMP2
CCL21|BMP4
CCL21|BMP6
CCL21|BMP7
CCL21|DKK1
CCL21|EBI3
CCL21|ESM1
CCL21|GAL
CCL21|GREM1
CCL21|IL17D
CCL21|INHBB
CCL21|LTBP2
CCL21|NMB
CCL21|NOV
CCL21|STC1
CCL21|TNFRSF11B
CCL21|TNFSF13B
CCL21|ANGPT1
CCL21|ANGPTL4
CCL21|BMPR2
CCL21|C3AR1
CCL21|CALCRL
CCL21|FGFRL1
CCL21|GHR
CCL21|IL10RA
CCL21|IL11RA
CCL21|IL2RB
CCL21|LGR4
CCL21|LIFR
CCL21|NR4A2
CCL21|OSMR
CCL21|PTGER4
CCL21|TEK
CCL21|TGFBR3
CCL21|CD48
CCL21|PRF1
CCL3|C3
CCL3|CX3CL1
CCL3|SEMA3B
CCL3|SEMA6A
CCL3|FPR1
CCL3|PLXNB1
CCL3|BMP7
CCL3|NOV
CCL3|TNFSF13B
CCL3|IL10RA
CCL3|IL11RA
CCL3|NR4A2
CCL3|TGFBR3
CCL3|CD48
CXCR4|RAC3
CXCR4|NRAS
CXCR4|PLAUR
CXCR4|PLXNA1
CXCR4|GMFG
CXCR4|JAG1
CXCR4|LTBP4
CXCR4|ANGPTL4
CXCR4|SORT1
FGR|SEMA4A
FGR|SEMA6A
FGR|BMP7
FGR|DKK1
FGR|EBI3
FGR|GAL
FGR|GREM1
FGR|IL17D
FGR|IL11RA
FGR|IL2RB
FGR|NR4A2
FGR|TGFBR3
MIF|SPP1
CD86|MALT1
CD86|PIK3CA
CD86|CX3CL1
CD86|SEMA3A
CD86|SEMA3B
CD86|SEMA5A
CD86|SEMA6A
CD86|SEMA6C
CD86|C5AR1
CD86|PLXNB1
CD86|BMP7
CD86|ESM1
CD86|GAL
CD86|GREM1
CD86|IL17D
CD86|INHBB
CD86|LTBP2
CD86|NMB
CD86|NOV
CD86|STC1
CD86|CALCRL
CD86|IL11RA
CD86|LGR4
CD86|NR4A2
CD86|PRKCA
HCK|RAC3
HCK|CX3CL1
HCK|SEMA3B
HCK|SEMA5A
HCK|C5AR1
HCK|PLXNA3
HCK|PLXNB1
HCK|BMP7
HCK|ESM1
HCK|GAL
HCK|LTBP4
HCK|NMB
HCK|NOV
HCK|PDGFD
HCK|STC1
HCK|ANGPTL4
HCK|BMPR2
HCK|FGFRL1
HCK|IL11RA
LYN|ADM
LYN|PDGFRL
LYN|FGFRL1
LYN|CBLB
BTK|SEMA3A
BTK|SEMA6A
BTK|BMP7
BTK|DKK1
BTK|GAL
BTK|GREM1
BTK|IL17D
BTK|IL11RA
BTK|IL2RB
BTK|NR4A2
BTK|PTGER4
BTK|TGFBR3
BTK|TNFRSF25
RAC2|FOS
RAC2|CKLF
RAC2|ADM
RAC2|CTGF
RAC2|ADIPOR2
RAC2|ANGPTL2
RAC2|IGF2R
RAC2|IL13RA1
RAC2|RXRA
RAC2|SDC4
RAC2|TNFRSF21
RAC3|NRAS
RAC3|CX3CL1
RAC3|SEMA3B
RAC3|SEMA5A
RAC3|C5AR1
RAC3|PLAUR
RAC3|PLXNA3
RAC3|PLXNB1
RAC3|BMP7
RAC3|ESM1
RAC3|GMFG
RAC3|JAG1
RAC3|LTBP2
RAC3|LTBP4
RAC3|NMB
RAC3|NOV
RAC3|RABEP1
RAC3|STC1
RAC3|ANGPT1
RAC3|ANGPTL4
RAC3|BMPR2
RAC3|C3AR1
RAC3|CALCRL
RAC3|FGFRL1
RAC3|LGR4
RAC3|TNFRSF1B
RAC3|PRKCA
RAC3|CBLB
NRAS|CYR61
NRAS|PLAUR
NRAS|GMFG
NRAS|ANGPTL4
FOS|NFKBIA
FOS|CYR61
FOS|SBDS
FOS|PLAUR
FOS|PLXNA1
FOS|CTGF
FOS|GMFG
FOS|GPI
FOS|ADIPOR2
FOS|ENG
FOS|IGF2R
FOS|IL13RA1
FOS|SDC4
FOS|SORT1
FOS|TNFRSF12A
FOS|TNFRSF21
FOS|ITGB2
FOS|NCK2
MALT1|CX3CL1
MALT1|SEMA3A
MALT1|SEMA3B
MALT1|SEMA5A
MALT1|SEMA6C
MALT1|C5AR1
MALT1|BMP7
MALT1|ESM1
MALT1|GAL
MALT1|GREM1
MALT1|LTBP2
MALT1|NMB
MALT1|TNFSF13B
MALT1|IL10RA
MALT1|IL11RA
MALT1|IL2RB
MALT1|NR4A2
MALT1|CD48
NFKBIA|CTGF
NFKBIA|CSF1R
PIK3CA|SEMA5A
PIK3CA|SEMA6C
PIK3CA|C5AR1
PIK3CA|BMP7
PIK3CA|GAL
PIK3CA|GREM1
PIK3CA|LTBP2
PIK3CA|NMB
PIK3CA|TNFSF13B
PIK3CA|IL10RA
PIK3CA|IL11RA
PIK3CA|NR4A2
INPP5D|SEMA3A
INPP5D|SEMA3B
INPP5D|SEMA6A
INPP5D|C5AR1
INPP5D|PLXNB1
INPP5D|DKK1
INPP5D|GREM1
INPP5D|IL17D
INPP5D|INHBB
INPP5D|NOV
INPP5D|ANGPT1
INPP5D|CALCRL
INPP5D|IL11RA
INPP5D|IL2RB
INPP5D|NR4A2
INPP5D|PTGER4
INPP5D|TGFBR3
INPP5D|TNFRSF25
INPP5D|PRKCA
IFITM1|GPI
C3|CX3CL1
C3|SEMA3B
C3|SEMA6A
C3|PLXNB1
C3|BMP7
C3|NOV
C3|IL10RA
C3|IL11RA
C3|NR4A2
C3|TGFBR3
C3|CD48
CKLF|TNFRSF14
CKLF|ITGB2
CX3CL1|SEMA3A
CX3CL1|SEMA3B
CX3CL1|SEMA4D
CX3CL1|SEMA5A
CX3CL1|SEMA6A
CX3CL1|C5AR1
CX3CL1|PLXNB1
CX3CL1|BMP7
CX3CL1|ESM1
CX3CL1|GREM1
CX3CL1|NMB
CX3CL1|NOV
CX3CL1|STC1
CX3CL1|TNFSF13B
CX3CL1|ANGPTL4
CX3CL1|C3AR1
CX3CL1|CALCRL
CX3CL1|IL10RA
CX3CL1|IL11RA
CX3CL1|IL2RB
CX3CL1|LGR4
CX3CL1|PRKCA
CX3CL1|CBLB
CYR61|ANGPTL2
CYR61|ENG
CYR61|SDC2
CYR61|SDC4
CYR61|TNFRSF21
CYR61|NCK2
SBDS|ENG
SBDS|TNFRSF12A
SEMA3A|SEMA4D
SEMA3A|SEMA6A
SEMA3A|SEMA6C
SEMA3A|PLXNB1
SEMA3A|BMP2
SEMA3A|BMP6
SEMA3A|BMP7
SEMA3A|DKK1
SEMA3A|EBI3
SEMA3A|ESM1
SEMA3A|GAL
SEMA3A|GREM1
SEMA3A|IL17D
SEMA3A|INHBB
SEMA3A|NOV
SEMA3A|PDGFD
SEMA3A|STC2
SEMA3A|TNFRSF11B
SEMA3A|VEGFC
SEMA3A|ANGPT1
SEMA3A|CALCRL
SEMA3A|FGFRL1
SEMA3A|GHR
SEMA3A|IL10RA
SEMA3A|IL2RB
SEMA3A|LGR4
SEMA3A|LIFR
SEMA3A|PTGER4
SEMA3A|TEK
SEMA3A|TNFRSF25
SEMA3A|CD48
SEMA3A|PRKCA
SEMA3B|SEMA5A
SEMA3B|SEMA6C
SEMA3B|C5AR1
SEMA3B|PLAUR
SEMA3B|PLXNB1
SEMA3B|BMP7
SEMA3B|ESM1
SEMA3B|JAG1
SEMA3B|LTBP2
SEMA3B|LTBP4
SEMA3B|NMB
SEMA3B|NOV
SEMA3B|STC1
SEMA3B|VEGFC
SEMA3B|ANGPTL4
SEMA3B|BMPR2
SEMA3B|C3AR1
SEMA3B|CALCRL
SEMA3B|FGFRL1
SEMA3B|IL10RA
SEMA3B|IL11RA
SEMA3B|IL2RB
SEMA3B|LGR4
SEMA3B|NR4A2
SEMA3B|OSMR
SEMA4A|SEMA6A
SEMA4A|EBI3
SEMA4A|GAL
SEMA4A|GREM1
SEMA4A|IL17D
SEMA4A|NR4A2
SEMA4D|FPR1
SEMA4D|DKK1
SEMA4D|ESM1
SEMA4D|STC1
SEMA4D|STC2
SEMA4D|TNFRSF25
SEMA4D|PRKCA
SEMA5A|SEMA6C
SEMA5A|C5AR1
SEMA5A|PLXNB1
SEMA5A|APLN
SEMA5A|BMP7
SEMA5A|ESM1
SEMA5A|GAL
SEMA5A|GREM1
SEMA5A|INHBB
SEMA5A|LTBP2
SEMA5A|NMB
SEMA5A|NOV
SEMA5A|STC1
SEMA5A|TNFRSF11B
SEMA5A|TNFSF13B
SEMA5A|ANGPT1
SEMA5A|ANGPTL4
SEMA5A|C3AR1
SEMA5A|CALCRL
SEMA5A|IL10RA
SEMA5A|IL11RA
SEMA5A|IL2RB
SEMA5A|NR4A2
SEMA5A|OSMR
SEMA5A|TEK
SEMA6A|FPR1
SEMA6A|EBI3
SEMA6A|NOV
SEMA6A|TNFSF13B
SEMA6A|ANGPT1
SEMA6A|CALCRL
SEMA6A|IL10RA
SEMA6A|IL11RA
SEMA6A|IL2RB
SEMA6A|NR4A2
SEMA6A|PTGER4
SEMA6A|TGFBR3
SEMA6A|TNFRSF25
SEMA6A|CD48
SEMA6C|C5AR1
SEMA6C|APLN
SEMA6C|BMP2
SEMA6C|BMP6
SEMA6C|BMP7
SEMA6C|DKK1
SEMA6C|ESM1
SEMA6C|GAL
SEMA6C|GREM1
SEMA6C|INHBB
SEMA6C|LTBP2
SEMA6C|NOV
SEMA6C|STC1
SEMA6C|TNFRSF11B
SEMA6C|CALCRL
SEMA6C|IL2RB
SEMA6C|LIFR
SLIT2|EDNRA
SLIT2|PLXNA3
SLIT2|BMP2
SLIT2|BMP4
SLIT2|DKK1
SLIT2|ESM1
SLIT2|PDGFC
SLIT2|PDGFD
SLIT2|PDGFRL
SLIT2|STC2
SLIT2|VEGFC
SLIT2|ANGPT1
TNC|CLEC11A
TNC|CTGF
C5AR1|PLXNB1
C5AR1|BMP7
C5AR1|ESM1
C5AR1|GAL
C5AR1|GREM1
C5AR1|LTBP2
C5AR1|NMB
C5AR1|NOV
C5AR1|PDGFD
C5AR1|STC1
C5AR1|ANGPTL4
C5AR1|BMPR2
C5AR1|CALCRL
C5AR1|IL11RA
C5AR1|IL2RB
C5AR1|LGR4
C5AR1|OSMR
C5AR1|PRKCA
EDNRA|BMP2
EDNRA|DKK1
EDNRA|IGF2
EDNRA|PDGFC
EDNRA|PDGFD
EDNRA|PDGFRL
EDNRA|STC2
EDNRA|ANGPT1
EDNRA|FGFRL1
FPR1|BMP7
FPR1|GAL
FPR1|IL17D
FPR1|NOV
FPR1|TNFSF13B
FPR1|IL11RA
FPR1|IL2RB
FPR1|NR4A2
FPR1|TGFBR3
FPR1|CD48
PLAUR|PLXNA1
PLAUR|PLXNB1
PLAUR|GMFG
PLAUR|JAG1
PLAUR|LTBP4
PLAUR|RABEP1
PLAUR|BMPR2
PLAUR|SORT1
PLAUR|TNFRSF1B
PLAUR|PAK1
PLAUR|NCK2
PLXNA1|GMFG
PLXNA1|ANGPTL4
PLXNA1|SORT1
PLXNA1|NCK2
PLXNA3|ESM1
PLXNA3|NOV
PLXNA3|PDGFC
PLXNA3|PDGFD
PLXNA3|PDGFRL
PLXNA3|STC1
PLXNA3|VEGFC
PLXNA3|ANGPT1
PLXNA3|ANGPTL4
PLXNA3|CALCRL
PLXNA3|FGFRL1
PLXNA3|LGR4
PLXNA3|PRKCA
PLXNA3|CBLB
PLXNB1|DKK1
PLXNB1|ESM1
PLXNB1|GREM1
PLXNB1|NMB
PLXNB1|NOV
PLXNB1|STC1
PLXNB1|VEGFC
PLXNB1|ANGPT1
PLXNB1|ANGPTL4
PLXNB1|C3AR1
PLXNB1|CALCRL
PLXNB1|FGFRL1
PLXNB1|IL10RA
PLXNB1|IL11RA
PLXNB1|IL2RB
PLXNB1|LGR4
PLXNB1|OSMR
PLXNB1|TNFRSF1B
PLXNB1|PRKCA
PLXNB1|CBLB
ADM|PDGFRL
ADM|ADIPOR2
ADM|CSF1R
ADM|IGF2R
ADM|RXRA
ADM|ITGB2
APLN|BMP2
APLN|BMP7
APLN|DKK1
APLN|ESM1
APLN|IGF2
APLN|INHBB
APLN|LTBP2
APLN|NMB
APLN|ANGPT1
APLN|CALCRL
APLN|LGR4
APLN|LIFR
APLN|OSMR
BMP2|BMP6
BMP2|DKK1
BMP2|NOV
BMP2|PDGFC
BMP2|PDGFD
BMP2|PDGFRL
BMP2|PTN
BMP2|STC1
BMP2|STC2
BMP2|TNFRSF11B
BMP2|VEGFC
BMP2|ANGPT1
BMP2|CALCRL
BMP2|GHR
BMP2|LGR4
BMP4|ESM1
BMP4|IGF2
BMP4|PDGFC
BMP4|PDGFD
BMP4|PTN
BMP4|STC1
BMP4|STC2
BMP4|VEGFC
BMP4|ANGPTL4
BMP4|BMPR2
BMP4|FGFRL1
BMP4|LGR4
BMP6|BMP7
BMP6|DKK1
BMP6|EBI3
BMP6|ESM1
BMP6|GAL
BMP6|GREM1
BMP6|TNFRSF11B
BMP6|ANGPT1
BMP6|LIFR
BMP6|TEK
BMP7|DKK1
BMP7|ESM1
BMP7|GAL
BMP7|GREM1
BMP7|IL17D
BMP7|INHBB
BMP7|LTBP2
BMP7|NMB
BMP7|NOV
BMP7|STC1
BMP7|TNFRSF11B
BMP7|TNFSF13B
BMP7|VEGFC
BMP7|ANGPTL4
BMP7|C3AR1
BMP7|CALCRL
BMP7|IL10RA
BMP7|IL11RA
BMP7|IL2RB
BMP7|LIFR
BMP7|NR4A2
BMP7|OSMR
BMP7|PTGER4
BMP7|TEK
BMP7|TGFBR3
BMP7|TNFRSF25
CTGF|GPI
CTGF|CSF1R
CTGF|IL13RA1
CTGF|SDC4
CTGF|TNFRSF21
DKK1|EBI3
DKK1|ESM1
DKK1|GAL
DKK1|GREM1
DKK1|IL17D
DKK1|INHBB
DKK1|LTBP2
DKK1|NOV
DKK1|PDGFC
DKK1|PDGFD
DKK1|PDGFRL
DKK1|STC2
DKK1|TNFRSF11B
DKK1|VEGFC
DKK1|ANGPT1
DKK1|CALCRL
DKK1|GHR
DKK1|LGR4
DKK1|PTGER4
DKK1|TEK
DKK1|TNFRSF25
DKK1|PRKCA
EBI3|GAL
EBI3|GREM1
EBI3|IL17D
EBI3|TNFRSF11B
EBI3|IL11RA
EBI3|NR4A2
EBI3|PRF1
ESM1|GREM1
ESM1|INHBB
ESM1|LTBP2
ESM1|NMB
ESM1|NOV
ESM1|PDGFC
ESM1|PDGFD
ESM1|PDGFRL
ESM1|STC1
ESM1|STC2
ESM1|TNFRSF11B
ESM1|VEGFC
ESM1|ANGPT1
ESM1|CALCRL
ESM1|FGFRL1
ESM1|GHR
ESM1|IL11RA
ESM1|IL2RB
ESM1|LGR4
ESM1|OSMR
ESM1|CBLB
[truncated: 261 more rows]
